# Supplementary material
Source: PubMed Central journal article supplement (PMC5520427)

**Figure S1**

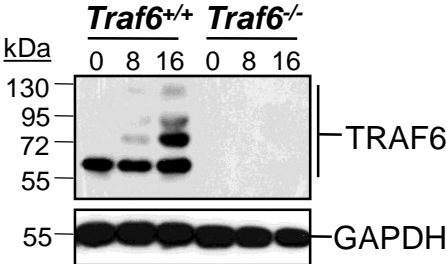

**Figure S2**

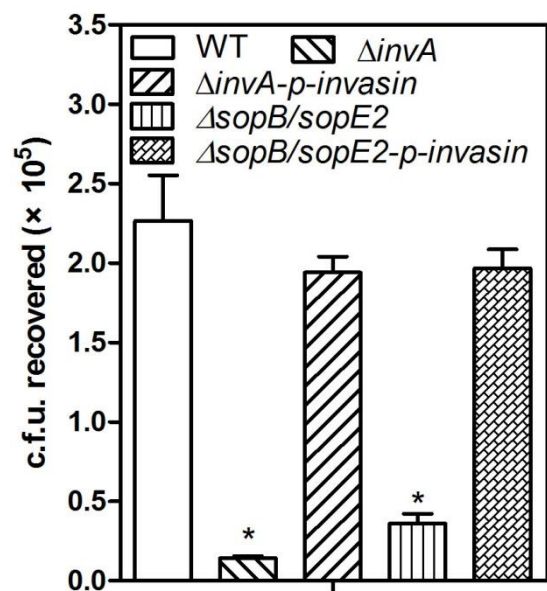

**Figure S3**

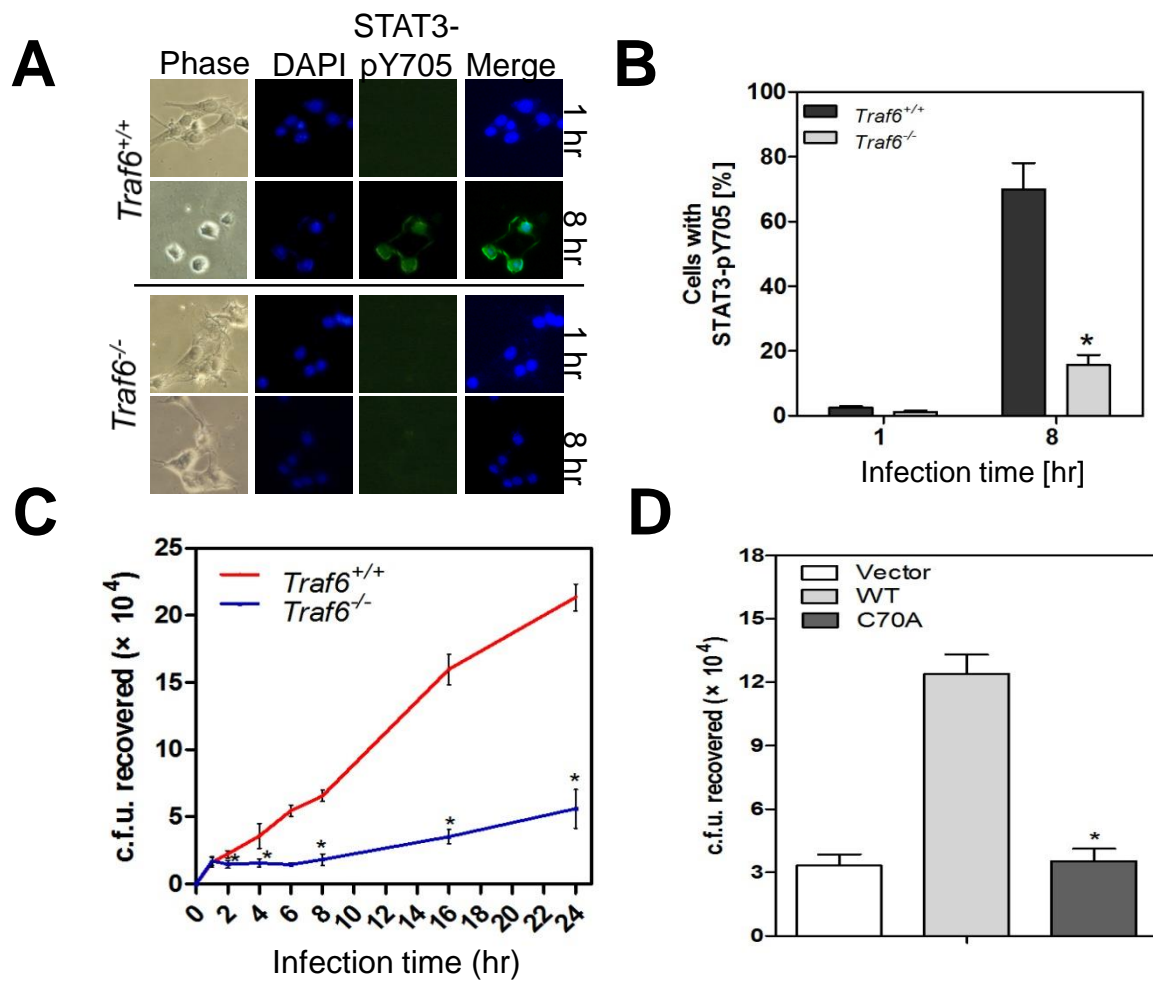

**Figure S4**

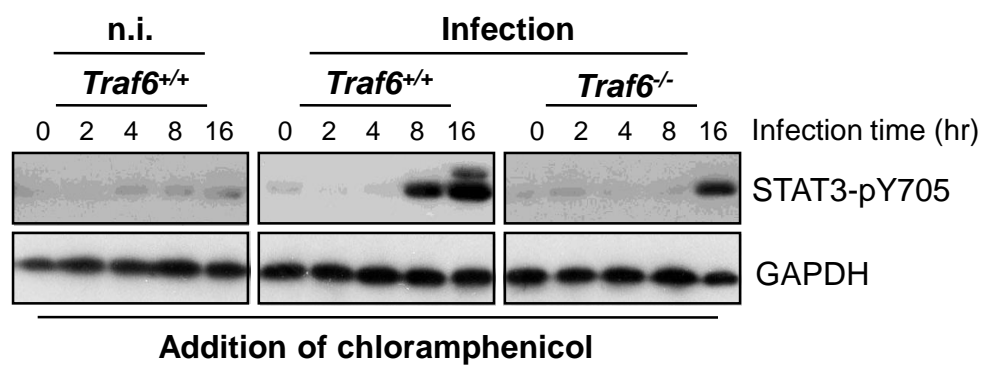

**Figure S5**

IP: rabbit-STAT3

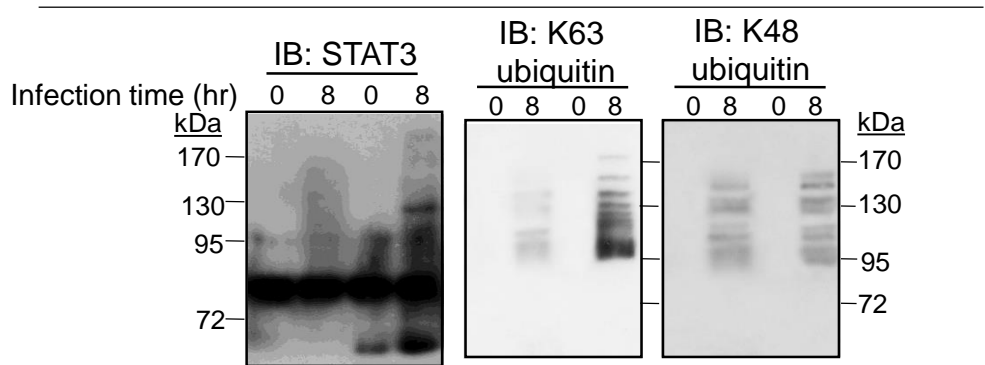

WCE

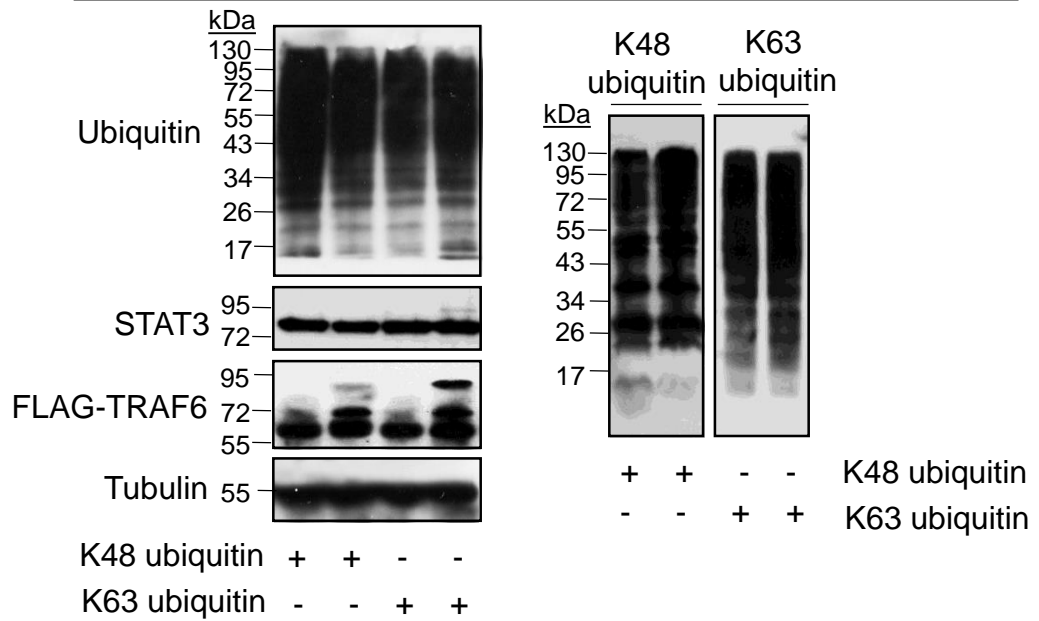

**Figure S6**

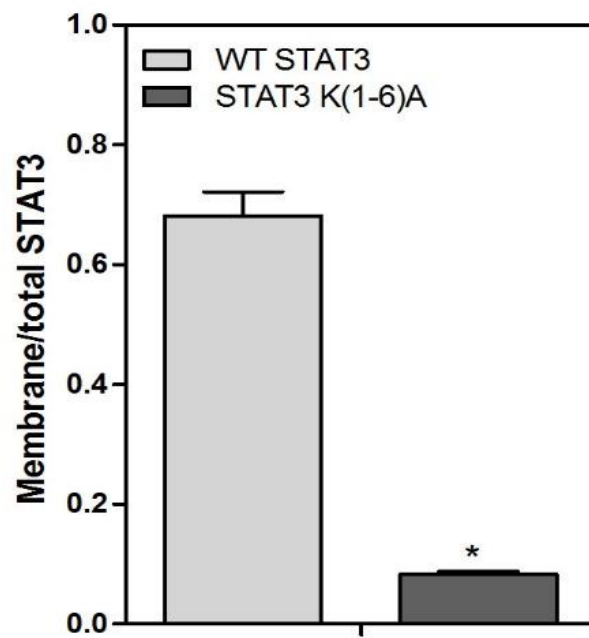

**Figure S7**

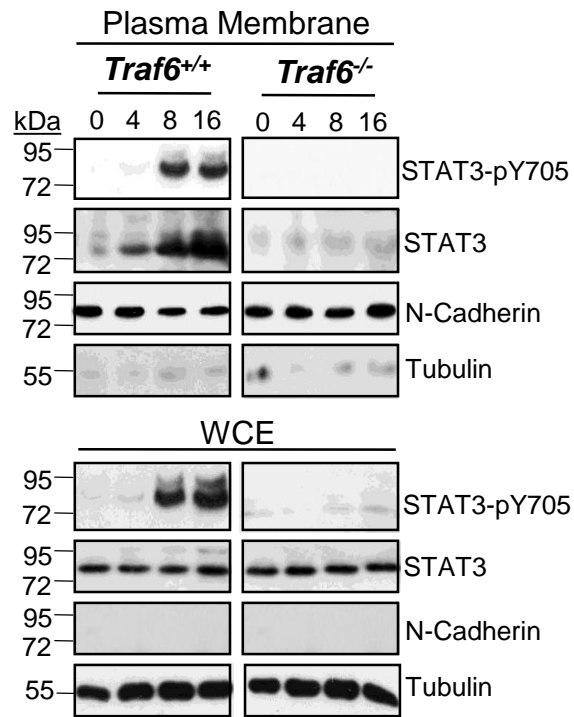

Figure S8

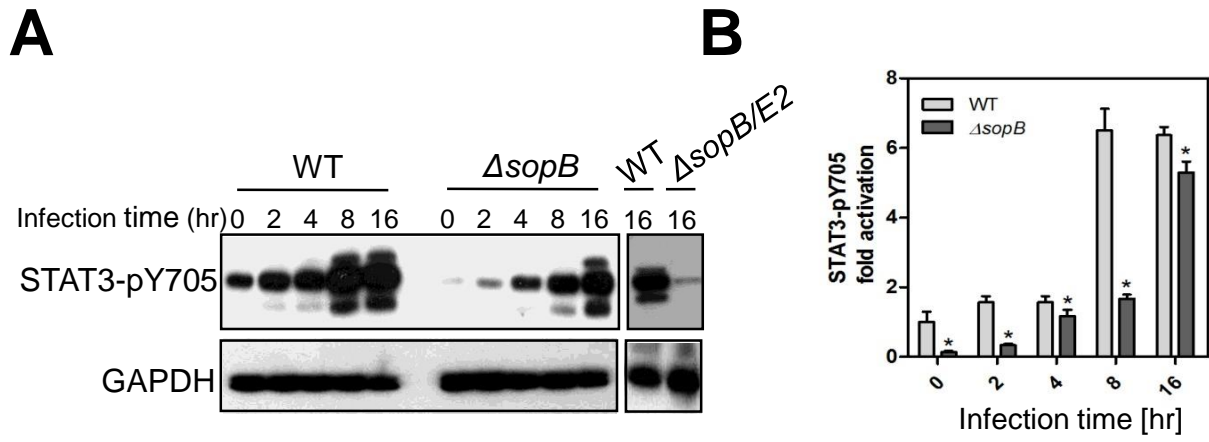

Supplement: IAI.00081-17_zii999092086s1.pdf [file IAI.00081-17_zii999092086s1.pdf]
